# Supplementary material for: Physicochemical Characteristics of Protein Isolated from Thraustochytrid Oilcake
Source: PubMed Central journal article supplement (PMC7353575; doi:10.3390/foods9060779), 2020-06-11
Supplement: foods-09-00779-s001.pdf [file foods-09-00779-s001.pdf]

## Thraustochytrids Biomass

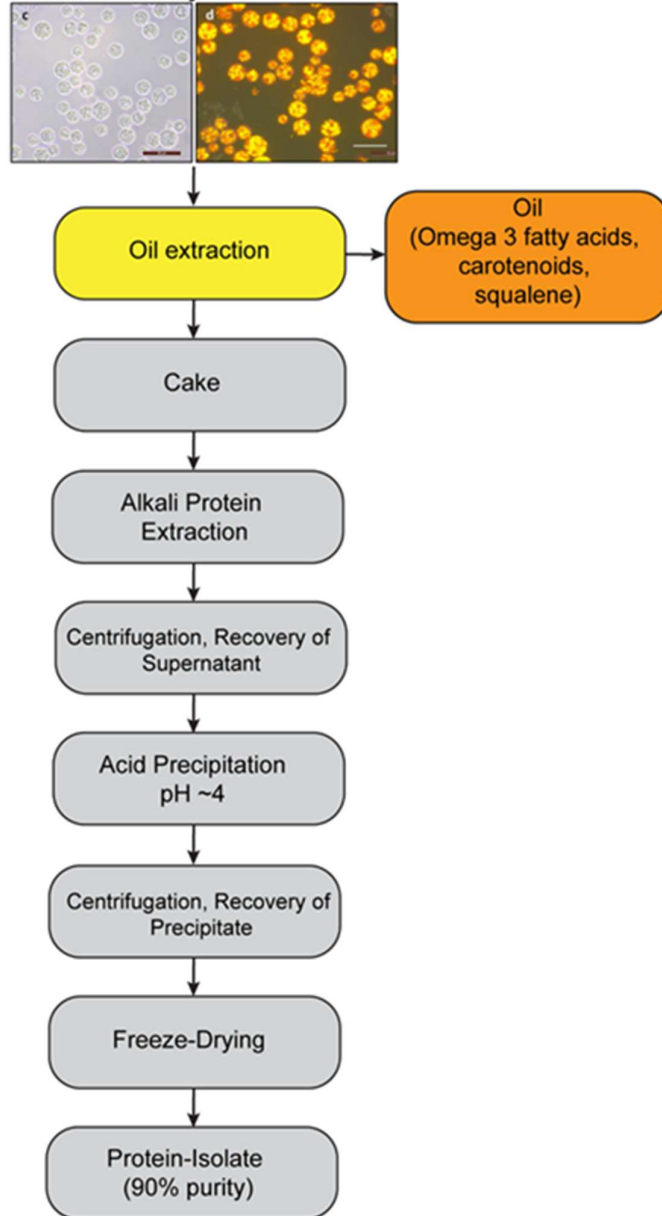

**Figure S1.** Schematic process flow diagram used to extract oil and TPI from cultured thraustochytrids cells.

(A)

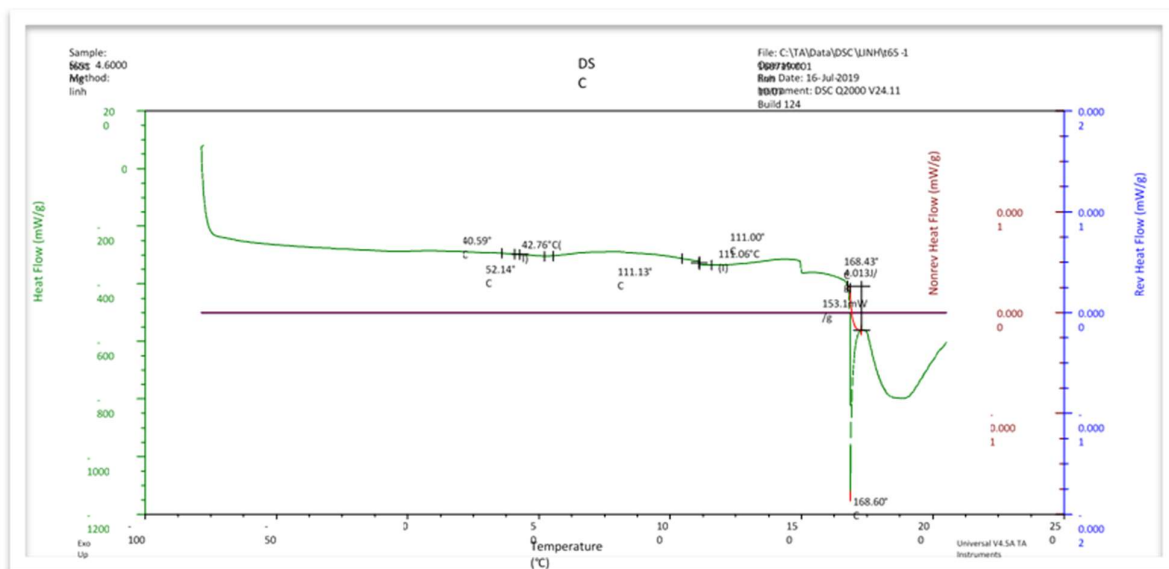

(B)

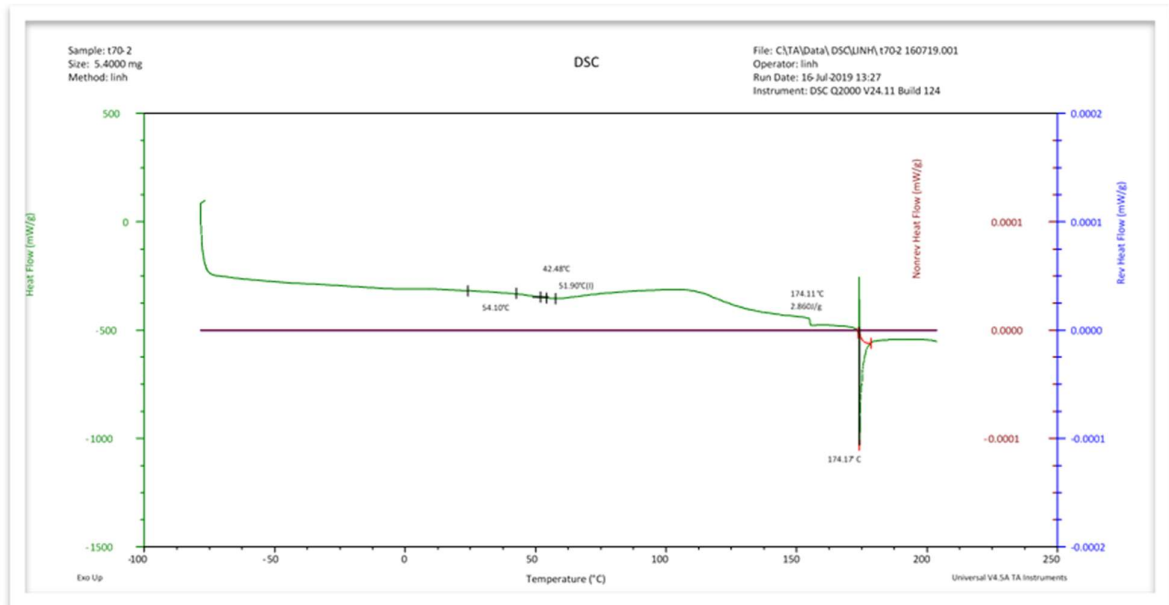

Figure S2. Differential scanning calorimetry (DSC) of TPI. (A) MAN65; (B) MAN70.

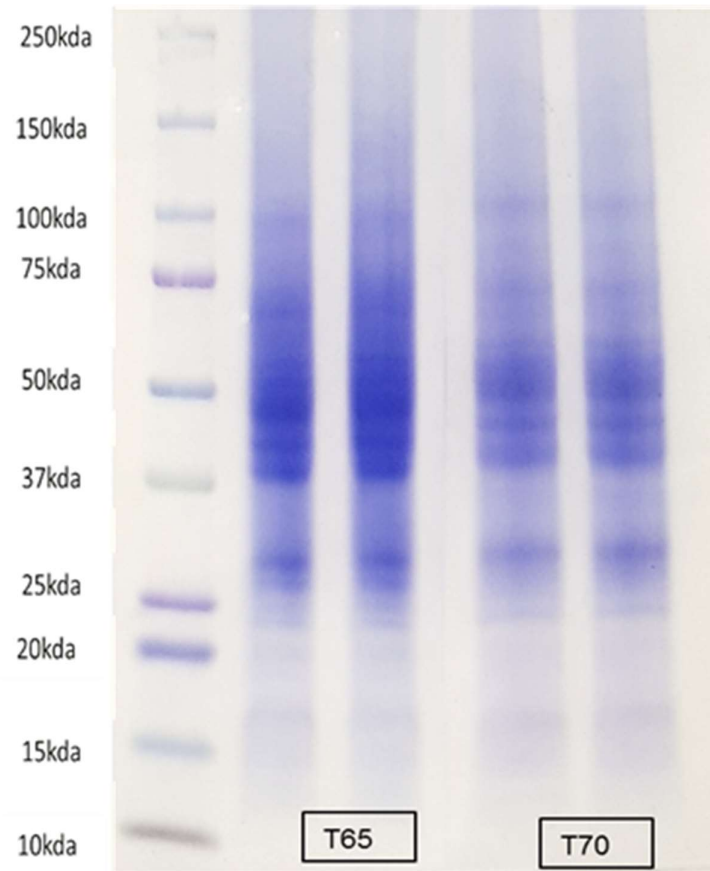

**Figure S3.** SDS-PAGE electrophoresis of thraustochytrids protein isolate obtained from its two strains MAN65 (A) and MAN70 (B).
